# Supplementary material for: Highly efficient tunable white emission with ultralong afterglow in Sb 3+ /Mn 2+ -codoped CsCdCl 3 crystals for multifunctional applications
Source: Royal Society of Chemistry journal article supplement (doi:10.1039/d4dt03038a), 2024-12-06
Supplement: d4dt03038a1.pdf [file d4dt03038a1.pdf]

# Supporting Information

## **Highly efficient tunable white emission with ultralong afterglow in Sb<sup>3+</sup>/Mn<sup>2+</sup>-codoped CsCdCl<sub>3</sub> crystals for multifunctional applications**

Ruonan Zhi, Linghang Kong,<sup>†\*</sup> Hui Peng,<sup>†\*</sup> Qilin Wei,<sup>‡</sup> Guang Dai,<sup>&\*</sup> Bingsuo Zou<sup>†</sup>

<sup>†</sup>State Key Laboratory of Featured Metal Materials and Life-cycle Safety for Composite Structures, MOE Key Laboratory of New Processing Technology for Nonferrous Metals and Materials, and School of Resources, Environment and Materials, Guangxi University, Nanning 530004, China.

<sup>‡</sup>School of Chemistry and Chemical Engineering, Shandong University, Jinan 250100, China.

<sup>&</sup>Tianjin Key Laboratory of Quantum Optics and Intelligent Photonics, School of Science, Tianjin University of Technology, Tianjin 300384, China.

**Table S1.** Comparison of element concentrations obtained from EDS of  $y\%Mn^{2+}$ -doped  $CsCdCl_3:0.1\%Sb^{3+}$ .

| Samples                                             | Nominal/mol<br>% (Sb) | Actual/mol<br>% (Sb) | Nominal/mo<br>l% (Mn) | Actual/mol<br>% (Mn) |
|-----------------------------------------------------|-----------------------|----------------------|-----------------------|----------------------|
| $CsCdCl_3:0.1\%Sb^{3+}$                             | 0.1                   | 0.035                | /                     | /                    |
| 0.1%Mn <sup>2+</sup> -doped $CsCdCl_3:0.1\%Sb^{3+}$ | 0.1                   | 0.036                | 0.1                   | 0.06                 |
| 0.5%Mn <sup>2+</sup> -doped $CsCdCl_3:0.1\%Sb^{3+}$ | 0.1                   | 0.035                | 0.5                   | 0.32                 |
| 1%Mn <sup>2+</sup> -doped $CsCdCl_3:0.1\%Sb^{3+}$   | 0.1                   | 0.037                | 1                     | 0.71                 |
| 3%Mn <sup>2+</sup> -doped $CsCdCl_3:0.1\%Sb^{3+}$   | 0.1                   | 0.034                | 3                     | 2.18                 |
| 5%Mn <sup>2+</sup> -doped $CsCdCl_3:0.1\%Sb^{3+}$   | 0.1                   | 0.033                | 5                     | 3.46                 |
| 10% Mn <sup>2+</sup> -doped $CsCdCl_3:0.1\%Sb^{3+}$ | 0.1                   | 0.036                | 10                    | 7.63                 |

**Table S2.** PL decay lifetime of  $y\%Mn^{2+}$ -doped  $CsCdCl_3:0.1\%Sb^{3+}$  monitored at 510 nm and the corresponding energy transfer efficiency.

| Samples                                             | Decay lifetime ( $\mu s$ ) | Energy transfer efficiency (%) |
|-----------------------------------------------------|----------------------------|--------------------------------|
| $CsCdCl_3:0.1\%Sb^{3+}$                             | 1.30                       | /                              |
| 0.1%Mn <sup>2+</sup> -doped $CsCdCl_3:0.1\%Sb^{3+}$ | 1.21                       | 6.9                            |
| 0.5%Mn <sup>2+</sup> -doped $CsCdCl_3:0.1\%Sb^{3+}$ | 0.998                      | 23.2                           |
| 1%Mn <sup>2+</sup> -doped $CsCdCl_3:0.1\%Sb^{3+}$   | 0.852                      | 34.5                           |
| 3%Mn <sup>2+</sup> -doped $CsCdCl_3:0.1\%Sb^{3+}$   | 0.617                      | 52.5                           |
| 5%Mn <sup>2+</sup> -doped $CsCdCl_3:0.1\%Sb^{3+}$   | 0.453                      | 65.2                           |
| 10% Mn <sup>2+</sup> -doped $CsCdCl_3:0.1\%Sb^{3+}$ | 0.313                      | 75.9                           |

**Table S3.** PLQY of  $0.1\%Sb^{3+}/y\%Mn^{2+}$  codoped  $CsCdCl_3$ .

| Samples                                             | PLQY (%) |
|-----------------------------------------------------|----------|
| $CsCdCl_3:0.1\%Sb^{3+}$                             | 60       |
| 0.1%Mn <sup>2+</sup> -doped $CsCdCl_3:0.1\%Sb^{3+}$ | 64       |
| 0.5%Mn <sup>2+</sup> -doped $CsCdCl_3:0.1\%Sb^{3+}$ | 69       |
| 1%Mn <sup>2+</sup> -doped $CsCdCl_3:0.1\%Sb^{3+}$   | 74       |
| 3%Mn <sup>2+</sup> -doped $CsCdCl_3:0.1\%Sb^{3+}$   | 67       |
| 5%Mn <sup>2+</sup> -doped $CsCdCl_3:0.1\%Sb^{3+}$   | 57       |
| 10% Mn <sup>2+</sup> -doped $CsCdCl_3:0.1\%Sb^{3+}$ | 50       |

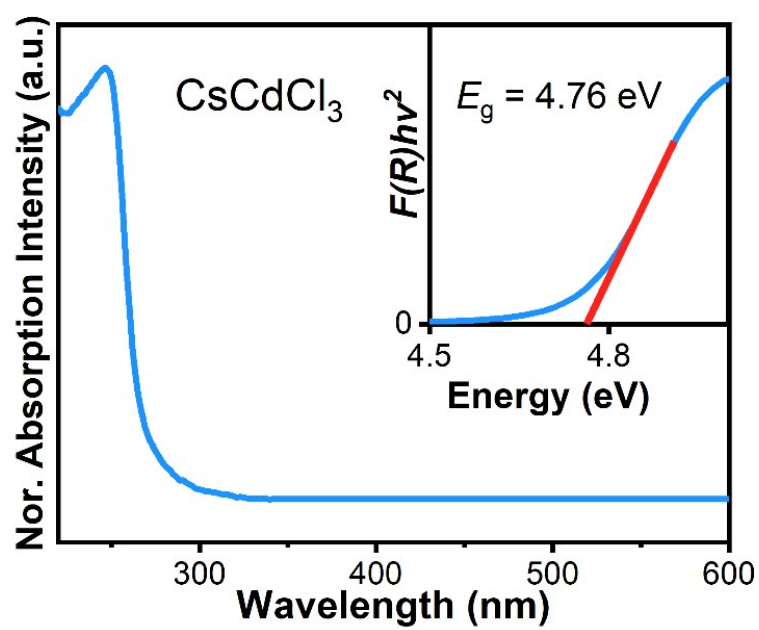

Figure S1. Absorption spectrum of CsCdCl<sub>3</sub>.

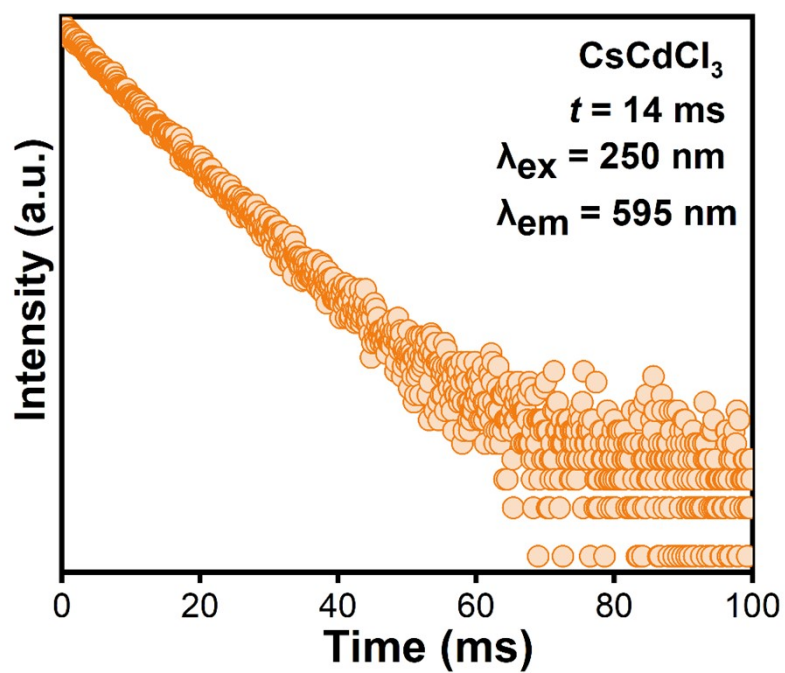

Figure S2. PL decay lifetime of CsCdCl<sub>3</sub>.

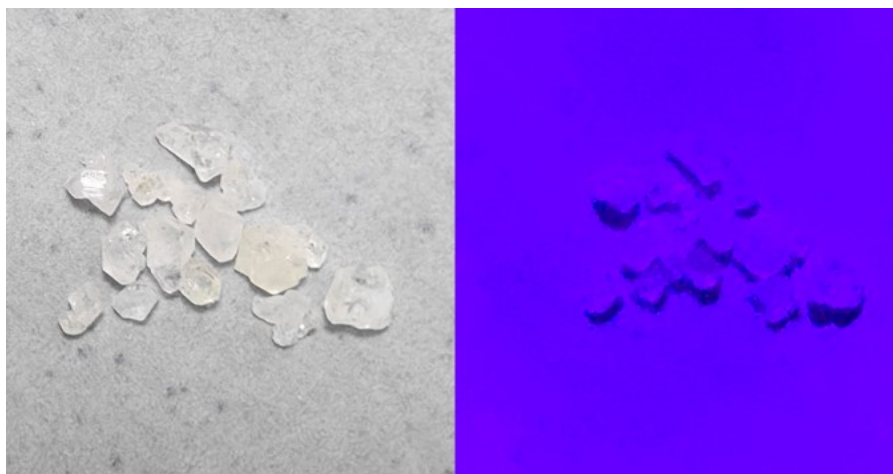

Figure S3. Optical images of  $\text{CsCdCl}_3$  under 350 nm UV lamp.

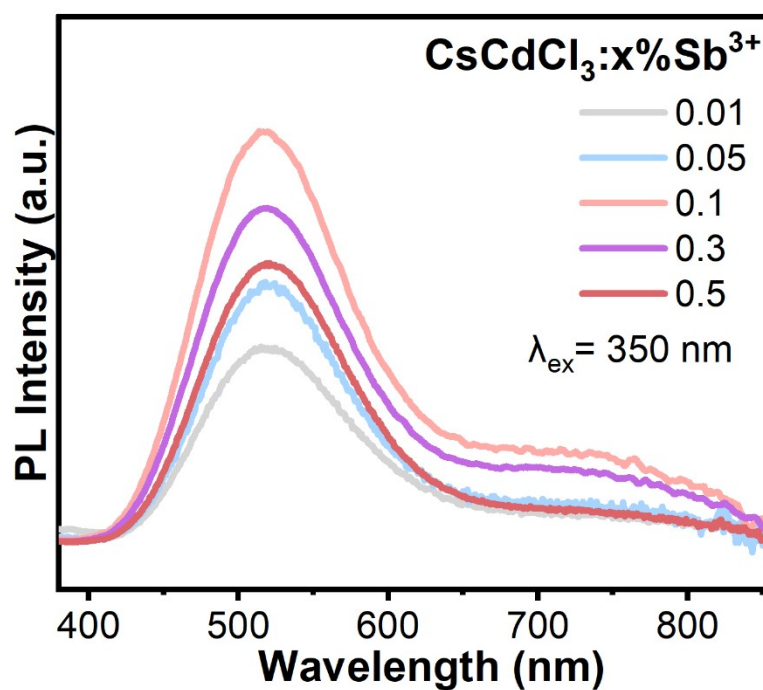

Figure S4. PL spectra of  $x\%\text{Sb}^{3+}$ -doped  $\text{CsCdCl}_3$  under 350 nm excitation.

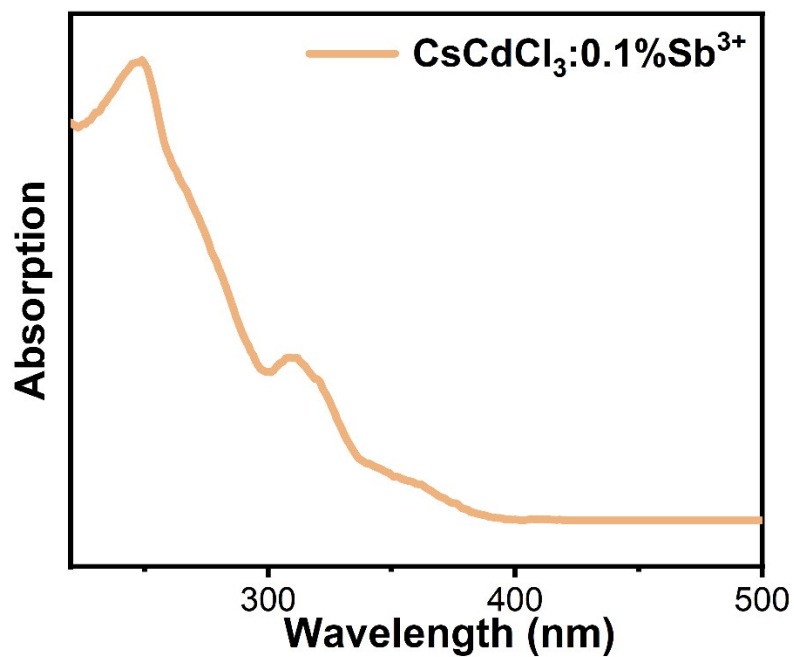

Figure S5. Absorption spectrum of 0.1%Sb<sup>3+</sup>-doped CsCdCl<sub>3</sub>.

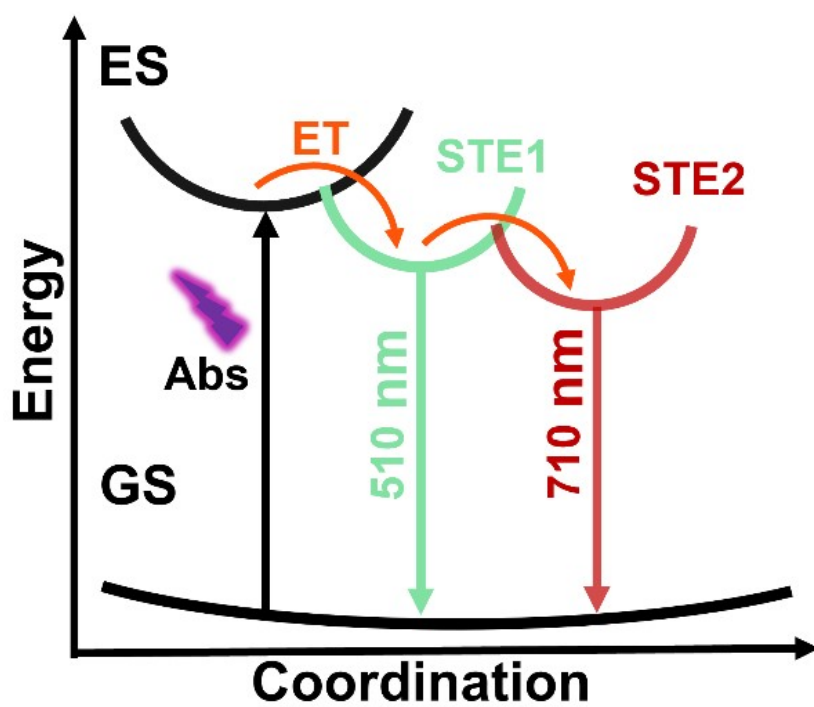

Figure S6. Schematic of the photophysical processes of Sb<sup>3+</sup>-doped CsCdCl<sub>3</sub>.

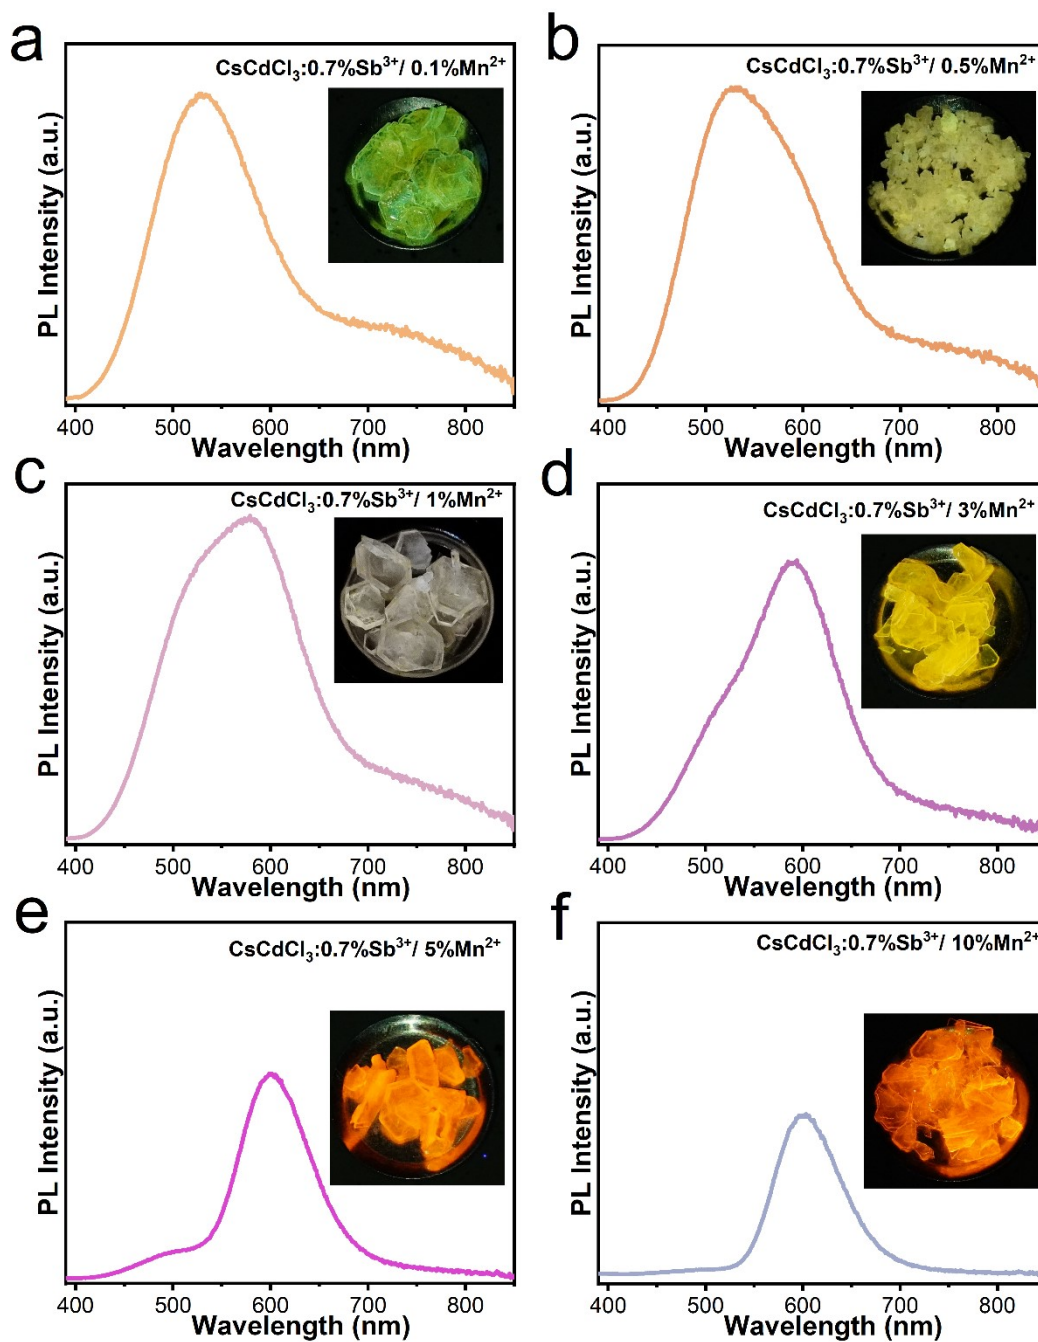

**Figure S7.** PL spectra of  $0.1\% \text{Sb}^{3+}/\gamma\% \text{Mn}^{2+}$ -codoped  $\text{CsCdCl}_3$  crystals, and the inset shows the photographs of  $0.1\% \text{Sb}^{3+}/\gamma\% \text{Mn}^{2+}$ -codoped  $\text{CsCdCl}_3$  crystals under 365 nm irradiation. (a)  $0.1\% \text{Sb}^{3+}/0.1\% \text{Mn}^{2+}$ -codoped  $\text{CsCdCl}_3$  crystals; (b)  $0.1\% \text{Sb}^{3+}/0.5\% \text{Mn}^{2+}$ -codoped  $\text{CsCdCl}_3$  crystals; (c)  $0.1\% \text{Sb}^{3+}/1\% \text{Mn}^{2+}$ -codoped  $\text{CsCdCl}_3$  crystals; (d)  $0.1\% \text{Sb}^{3+}/3\% \text{Mn}^{2+}$ -codoped  $\text{CsCdCl}_3$  crystals; (e)  $0.1\% \text{Sb}^{3+}/5\% \text{Mn}^{2+}$ -codoped  $\text{CsCdCl}_3$  crystals; (f)  $0.1\% \text{Sb}^{3+}/10\% \text{Mn}^{2+}$ -codoped  $\text{CsCdCl}_3$  crystals.

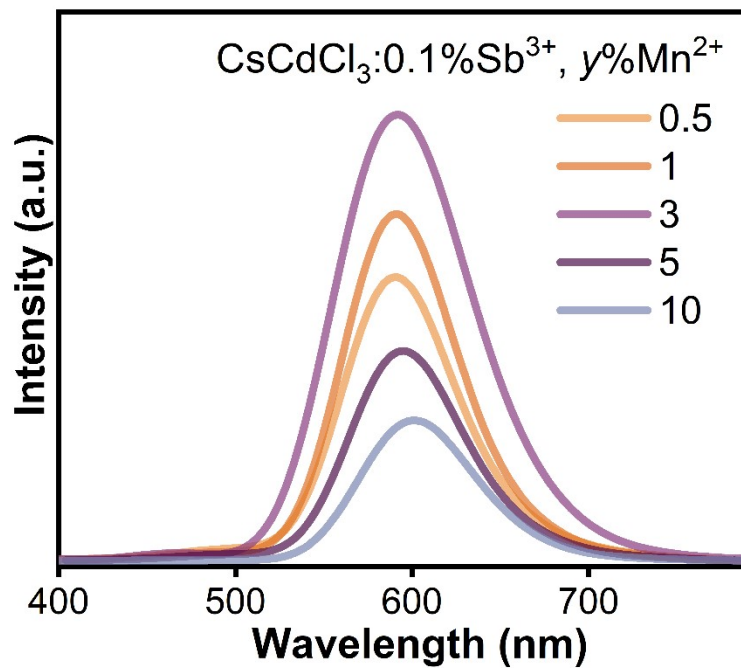

Figure S8. PL spectra of 0.1%Sb<sup>3+</sup>/Mn<sup>2+</sup>-codoped CsCdCl<sub>3</sub> under 254 nm excitation.

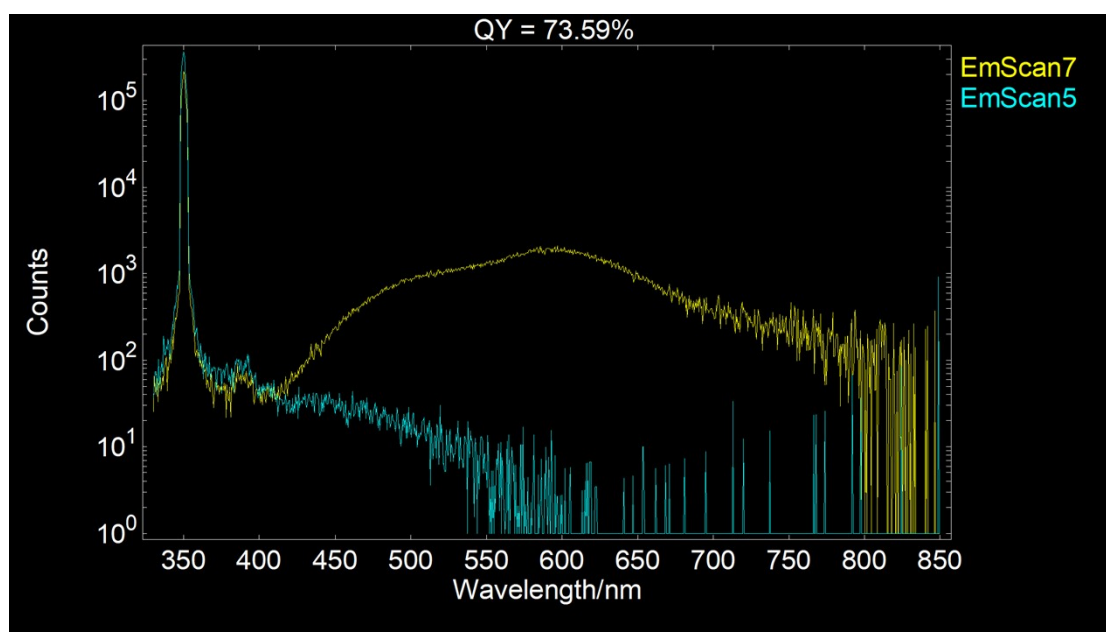

Figure S9. The PLQY of 0.1%Sb<sup>3+</sup>/1%Mn<sup>2+</sup>-codoped CsCdCl<sub>3</sub>.

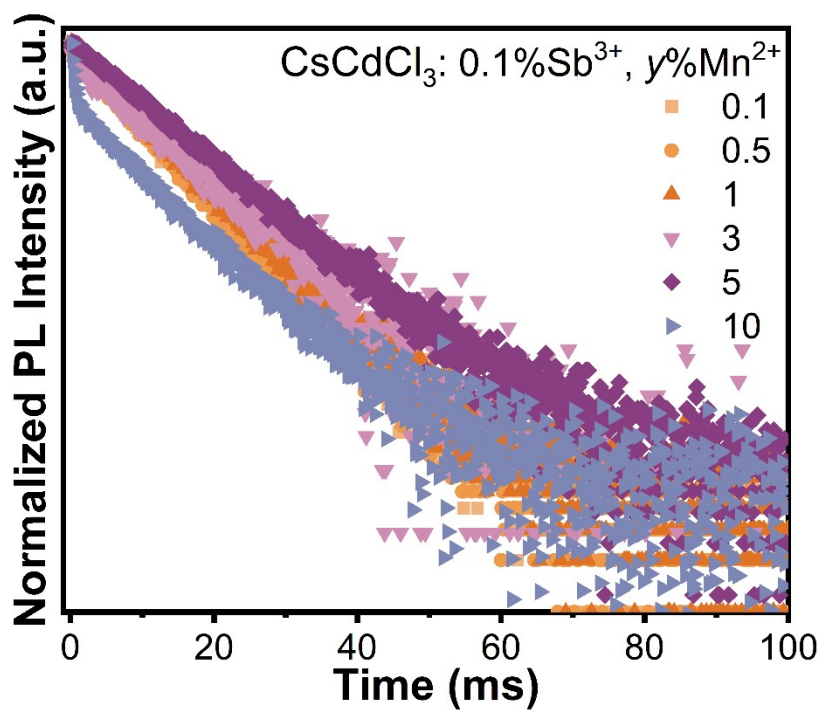

Figure S10. PL decay lifetime of 0.1% $\text{Sb}^{3+}$ /  $\text{Mn}^{2+}$ -codoped  $\text{CsCdCl}_3$  monitored at 600 nm.

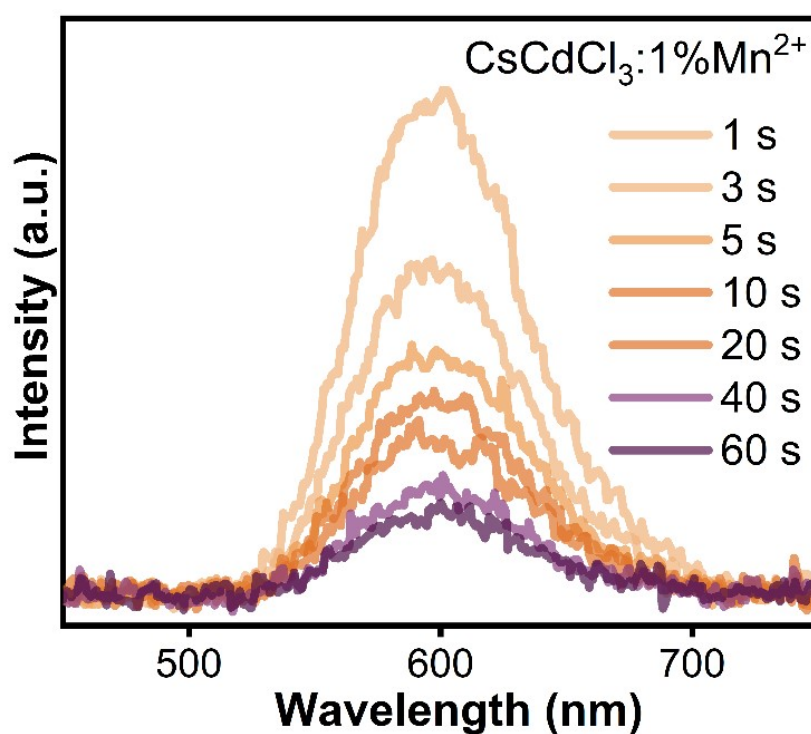

Figure S11. Afterglow emission spectra of 1% $\text{Mn}^{2+}$ -doped  $\text{CsCdCl}_3$  at various delay times after stopping 254 nm excitation.



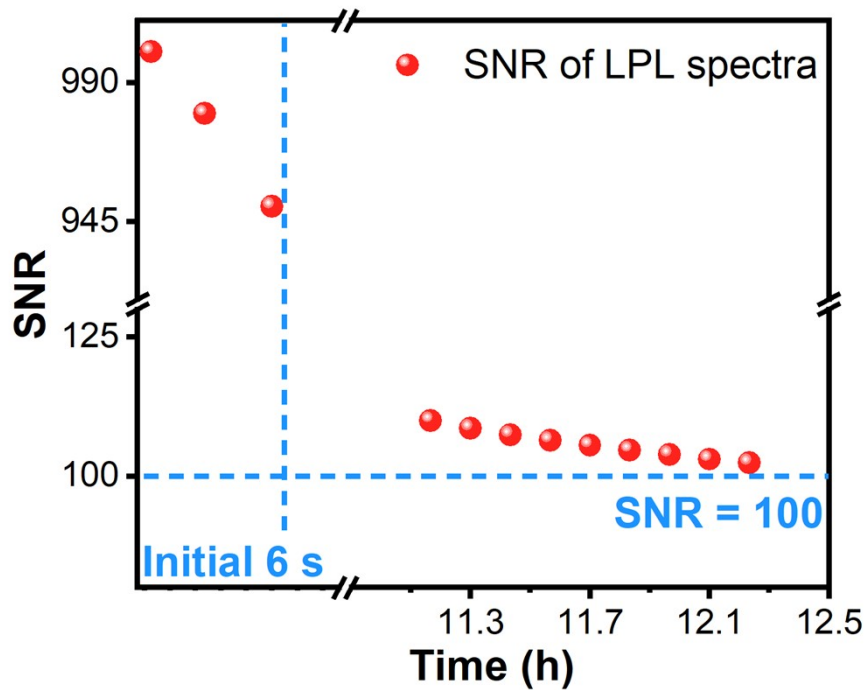

Figure S12. The signal-to-noise of afterglow spectra of 0.1% $\text{Sb}^{3+}$ /1% $\text{Mn}^{2+}$ -codoped  $\text{CsCdCl}_3$ .

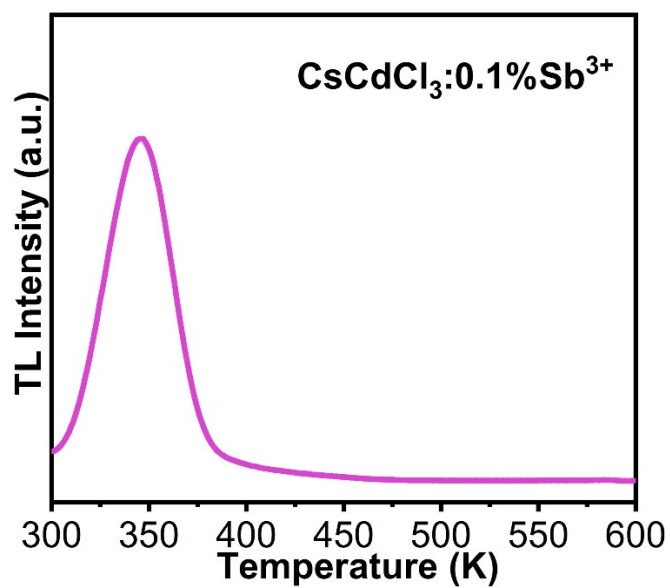

Figure S13. TL spectra of 0.1% $\text{Sb}^{3+}$ -doped  $\text{CsCdCl}_3$ .

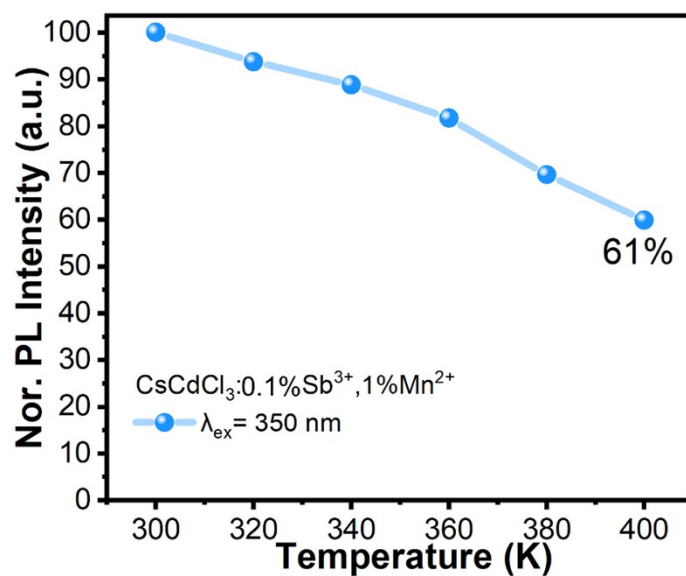

Figure S14. PL intensity of high temperature-dependent PL spectra excited by 350 nm.

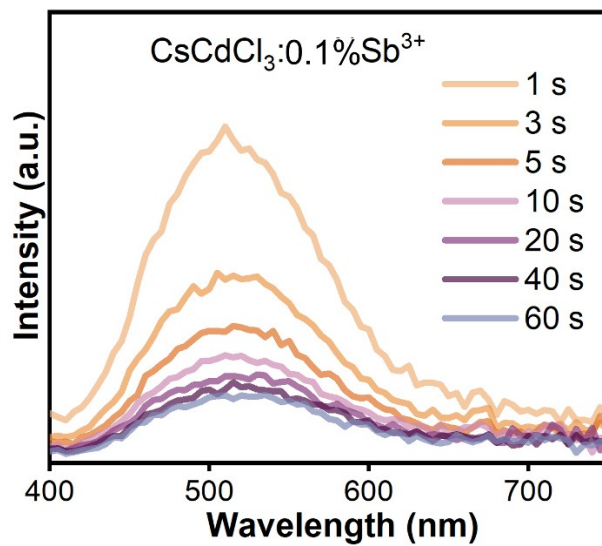

Figure S15. Afterglow emission spectra of 0.1%Sb<sup>3+</sup>-doped CsCdCl<sub>3</sub> at various delay times after stopping 350 nm excitation.

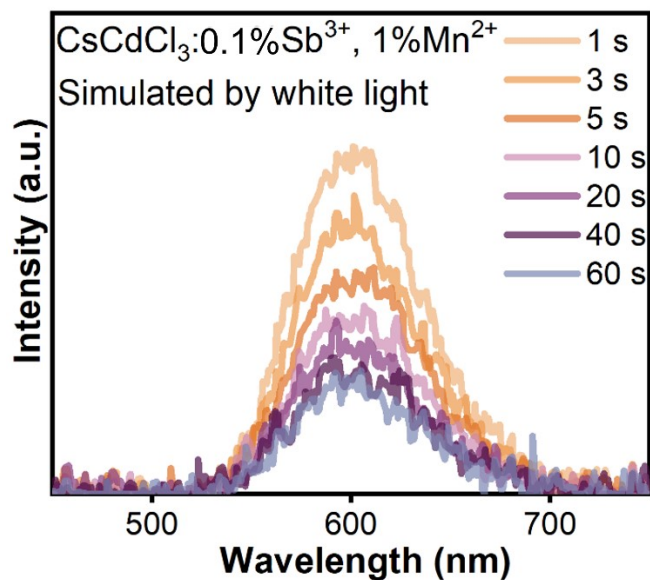

**Figure S16.** Afterglow emission spectra of 0.1%Sb<sup>3+</sup>/1%Mn<sup>2+</sup>-codoped CsCdCl<sub>3</sub> simulated by white light after 12 hours pre-delay.

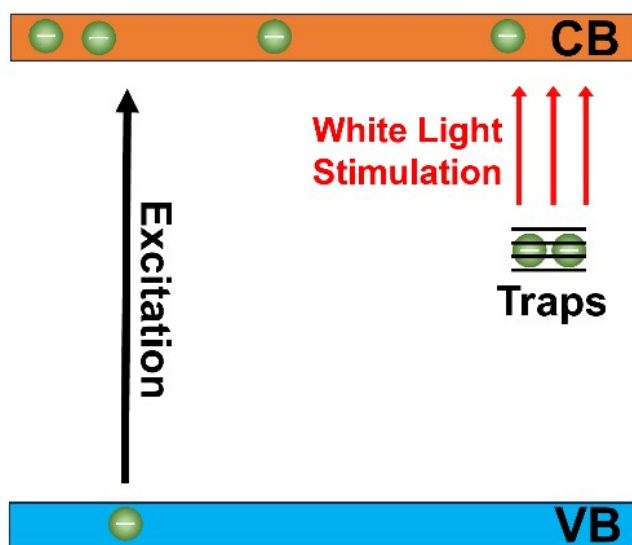

**Figure S17.** The difference between “excitation” and “white-stimulation” behaviors.

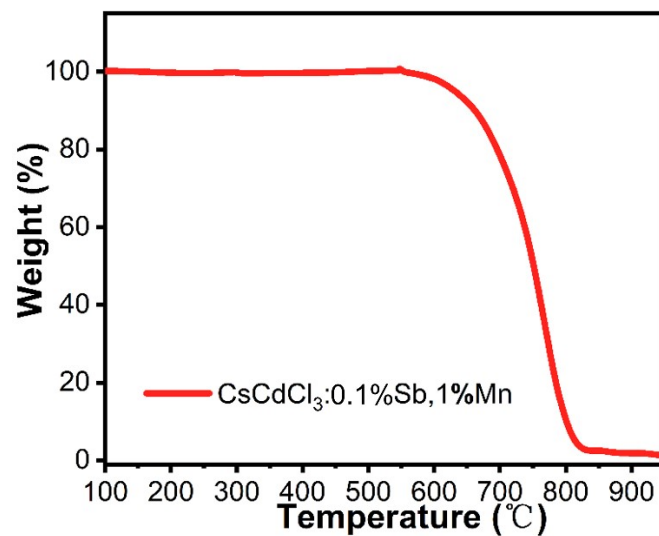

**Figure S18.** TGA curve of 0.1%Sb<sup>3+</sup>/1%Mn<sup>2+</sup>-codoped CsCdCl<sub>3</sub>-codoped CsCdCl<sub>3</sub>.

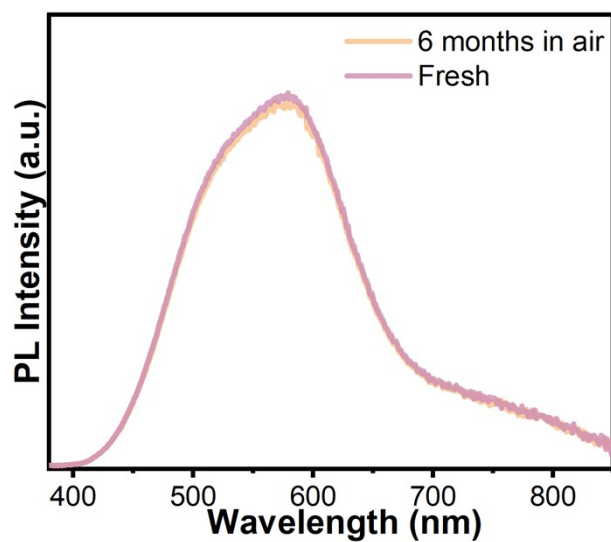

**Figure S19.** PL spectra of 0.1%Sb<sup>3+</sup>/1%Mn<sup>2+</sup>-codoped CsCdCl<sub>3</sub> before and after storing in air for 6 months.

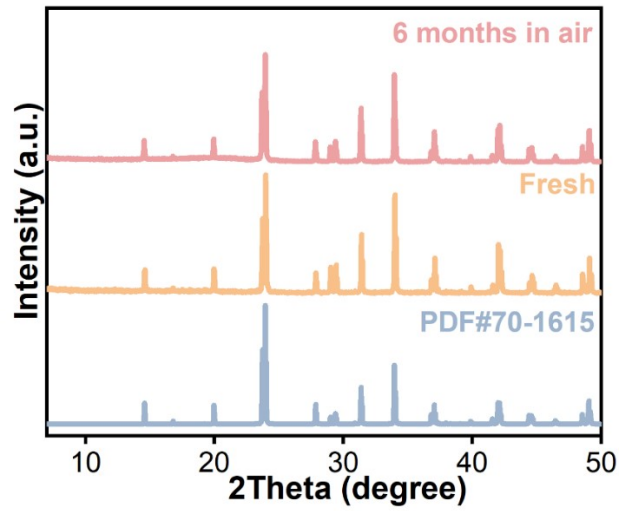

**Figure S20.** PXRD patterns of 0.1% $\text{Sb}^{3+}$ /1% $\text{Mn}^{2+}$ -codoped  $\text{CsCdCl}_3$  before and after storing in air for 6 months.

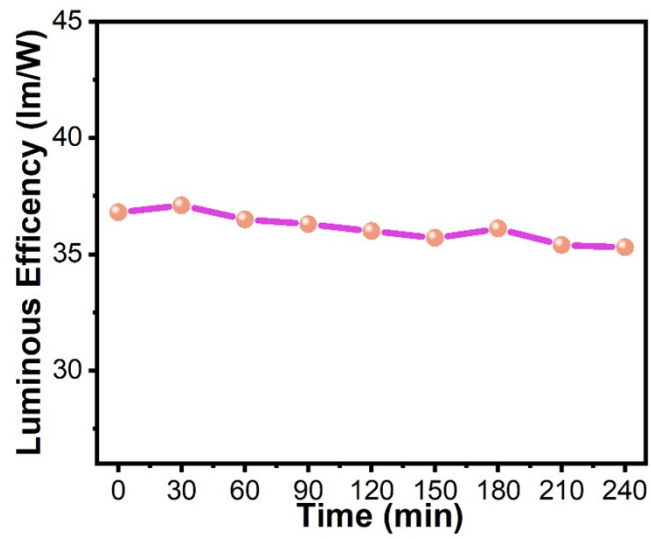

**Figure S21.** The operational stability of 0.1% $\text{Sb}^{3+}$ /1% $\text{Mn}^{2+}$ -codoped  $\text{CsCdCl}_3$ -based WLED.
